# Supplementary material
Source: PubMed Central journal article supplement (PMC10227005)

## SUPPLEMENTARY MATERIAL

### *Combining skin and olfactory $\alpha$ -synuclein seed amplification assays (SAA) - towards biomarker-driven phenotyping in synucleinopathies*

Kuzkina A.<sup>1,4\*</sup>, Rößle J.<sup>1</sup>, Seger, A.<sup>2</sup>, Panzer C.<sup>1</sup>, Kohl A.<sup>1</sup>, Maltese V.<sup>1</sup>, Musacchio T.<sup>1</sup>, Blaschke S.J.<sup>2</sup>, Tamgüney G.<sup>9,10</sup>, Kaulitz S.<sup>3</sup>, Rak K.<sup>3</sup>, Scherzad A.<sup>3</sup>, Zimmermann P.H.<sup>7,8</sup>, Klussmann J.P.<sup>7,8</sup>, Hackenberg S.<sup>3,5</sup>, Volkmann J.<sup>1</sup>, Sommer C.<sup>1</sup>, Sommerauer M.<sup>2,6</sup>, Doppler K.<sup>1\*</sup>

**Address correspondence to:** Anastasia Kuzkina at [akuzkina@bwh.harvard.edu](mailto:akuzkina@bwh.harvard.edu) and Kathrin Doppler at [doppler\\_k@ukw.de](mailto:doppler_k@ukw.de)

#### CONTENTS:

**Supplementary Figure 1** Serial dilutions of PD and control samples

**Supplementary Figure 2** Additional examples of pronounced nasal brushing matrix interference with the SAA.

**Supplementary Figure 3** Purification of recombinant  $\alpha$ -synuclein (SAA substrate)

**Supplementary Figure 4** Mass spectrometry analysis of the substrate

**Supplementary Figure 5** Technical controls

**Supplementary Table 1** Characteristics of patients with a negative skin biopsy compared to the rest of the PD cohort.

**Supplementary Figure 6** All SAA graphs of the dataset

**Supplementary Dataset:** All raw SAA data – see separate excel file.

**Supplementary Figure 1: Serial dilutions of PD and control samples. A) Distribution of the number of positive replicates (0-4) at different sample dilutions (1:20 – 1:1000) in the control (n=5) and PD (n=5) samples. B) SAA curves of PD samples with different seeding capacities. C) SAA curves of two of the control samples.**

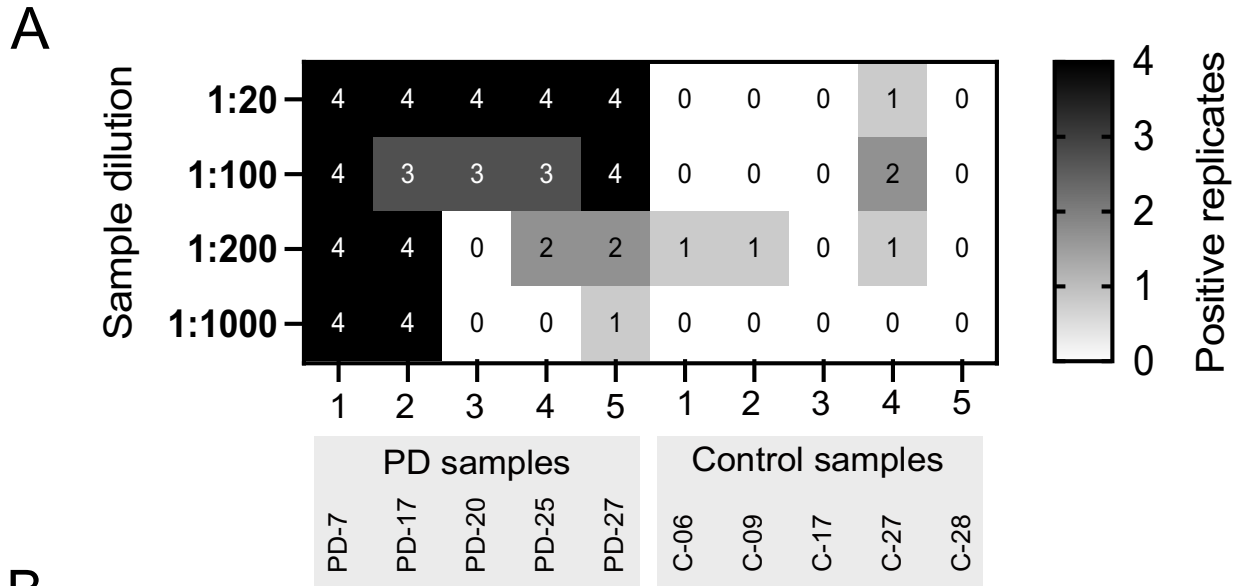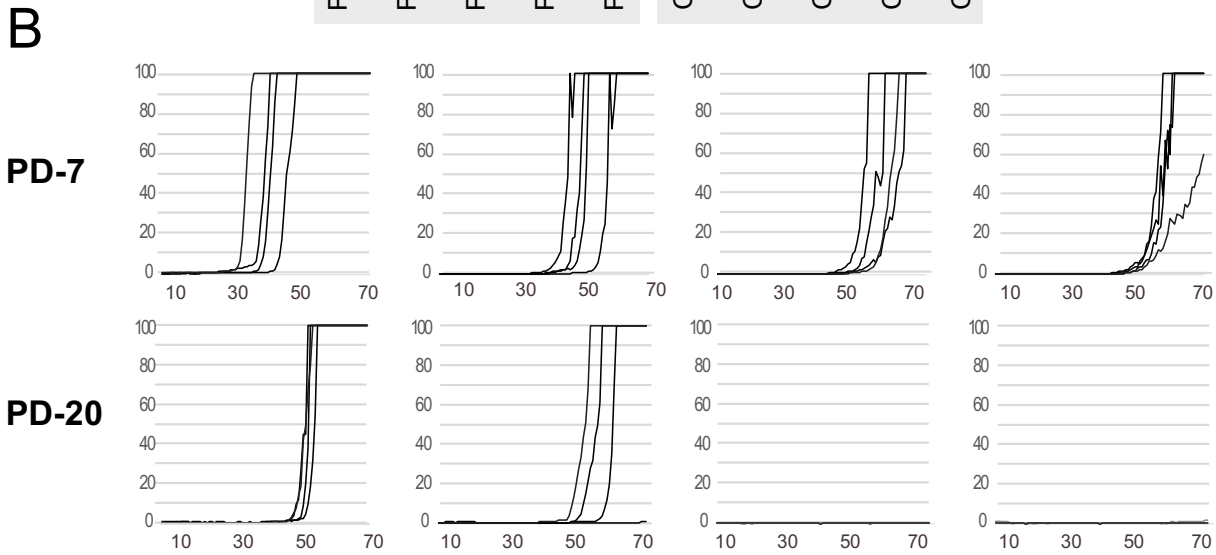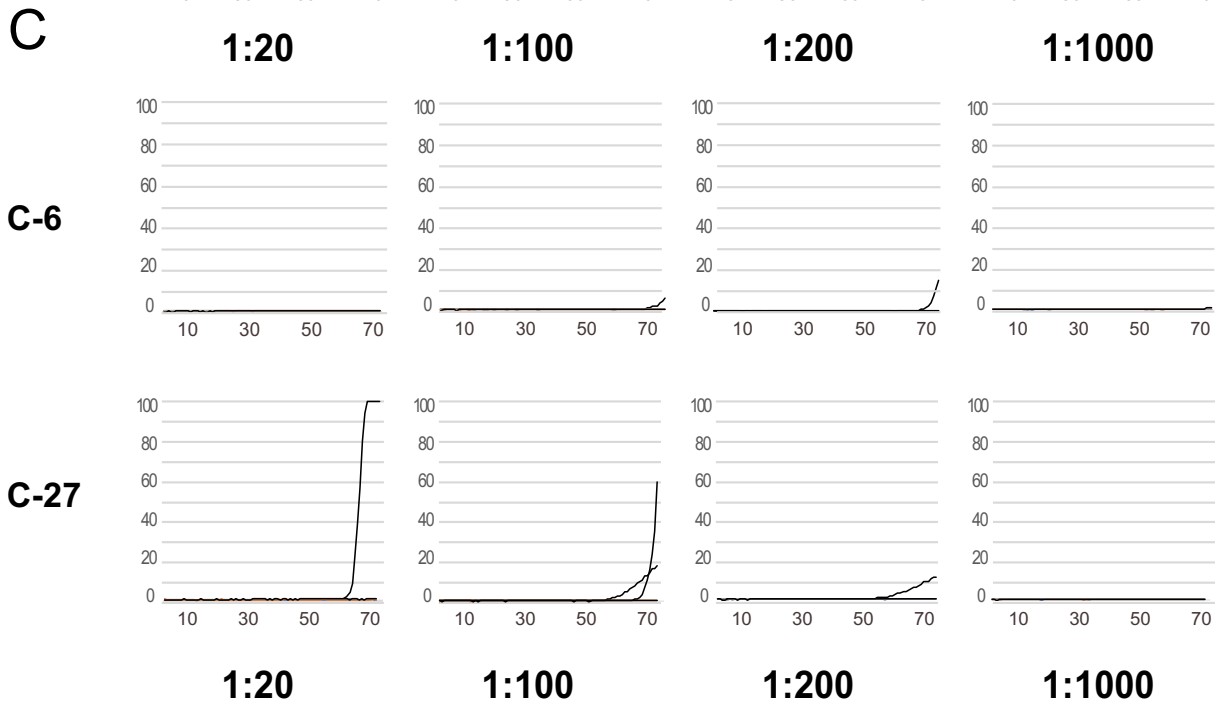

**Supplementary Figure 2:** Additional examples of pronounced interference of nasal brushing matrix with the a-syn aggregation tested by the addition of a known seed (PD brain lysate) **A)** The majority of the tested negative samples (n=38, 76%) showed a prolongation of the lag phase to varying degrees, two examples are shown here. **B)** Some samples, n=12 (24%), could inhibit a-syn aggregation to the extent that the outcome was deemed negative. Two such examples (both replicated twice) are shown. The proportion of samples inhibiting the SAA was similar in different disease groups (6 out of 27 (22%) for controls, 3 of 14 (21%) for PD, and 3 out of 9 (33%) for iRBD). **C)** Examples of the other four samples (5 in total, or 10% of tested negative samples) that changed the ThT curve morphology of the PD brain lysate.

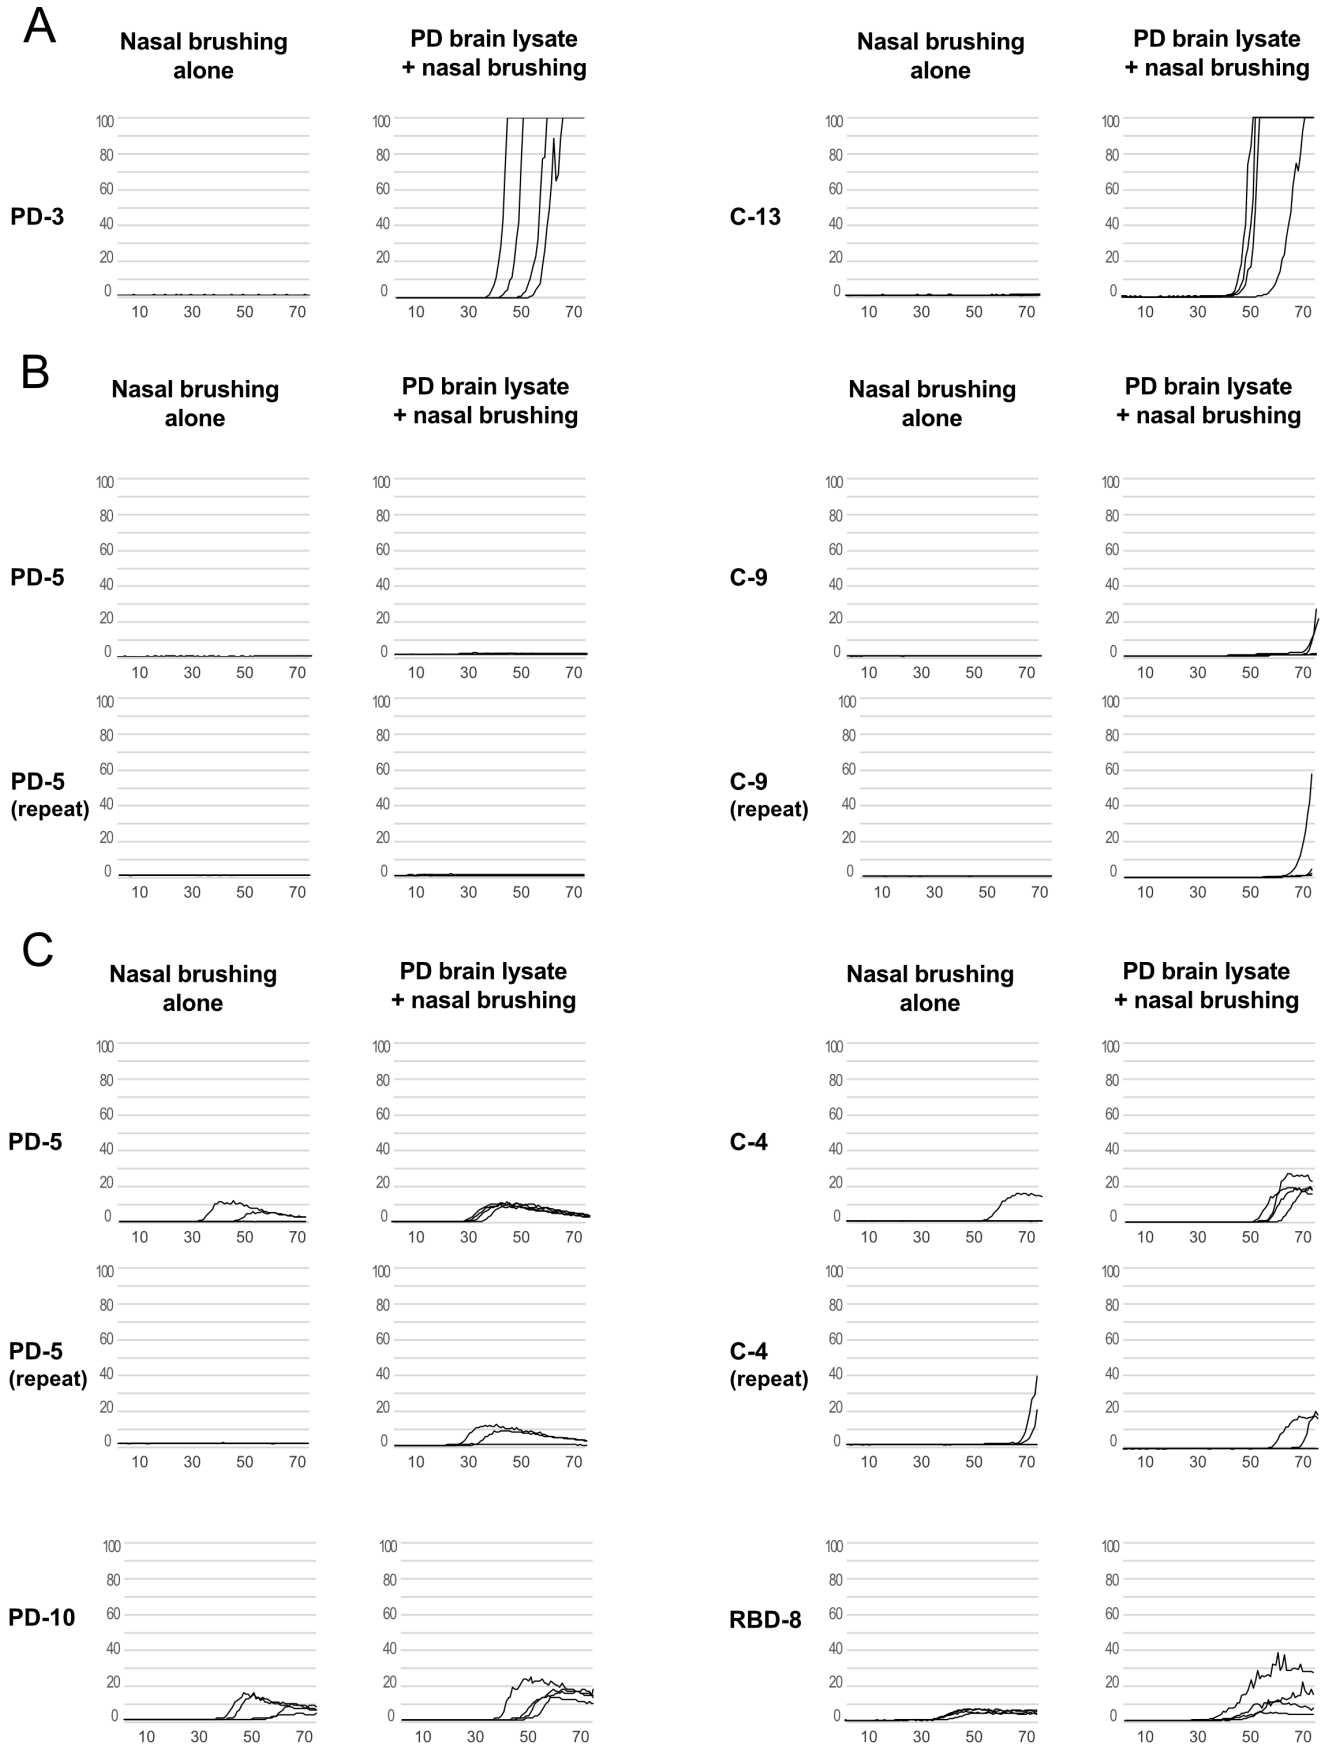

**Supplementary Figure 3** Purification of recombinant  $\alpha$ -synuclein (SAA substrate). *E. coli* strain BL21 (DE3) was transformed with plasmid pET21-b- $\alpha$ -syn (Y136TAT). **A)** Coomassie stain of an SDS-PAGE of different purification steps. WCE: whole cell lysate. SL: soluble lysate. FT: flow-through. # size exclusion chromatography (SEC) eluates. **B)** Merged SEC chromatograms (IMAC pool was loaded on the column in two consecutive runs). Eluates #D2-D8 were pooled.

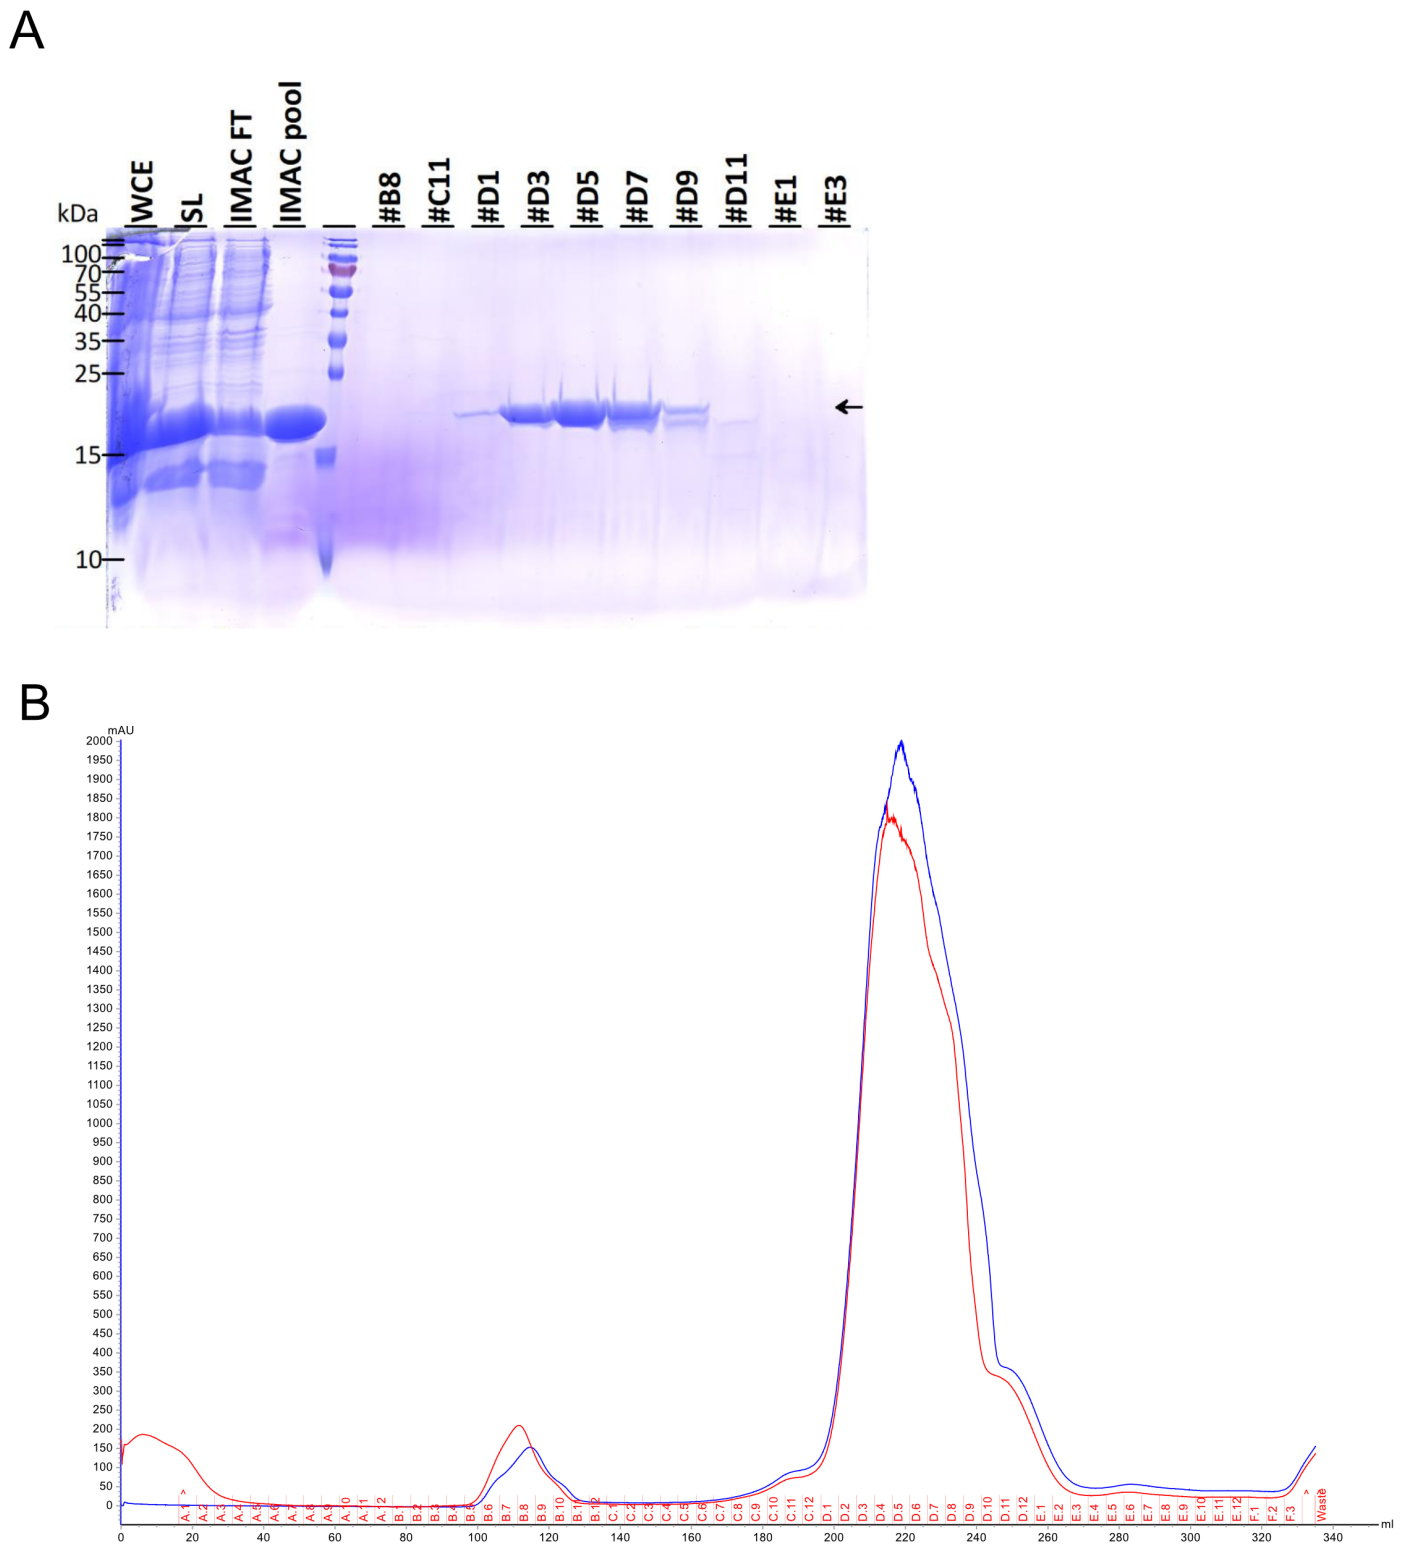

**Supplementary Figure 4** Mass spectrometry analysis of the substrate **A)** SDS-PAGE with Coomassie staining of the analyte prior to trypsin digestion. **B)** Custom database (AGMS) search using the complete protein sequence including the C-terminal 6xhistidine-tag showed 100% sequence coverage. **C)** SwissProt database search: matches with  $\alpha$ -synuclein and exponentially modified protein abundance indexes (emPAI) are shaded green.

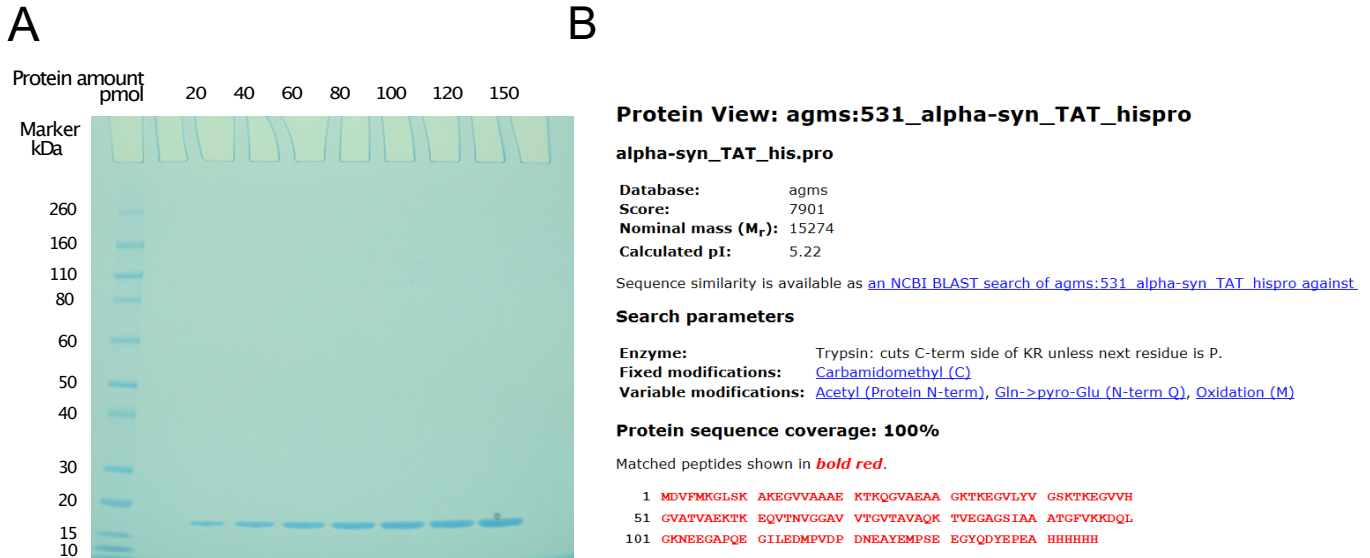

**C**

| Family | Member | Accession              | Score | Mass  | Num. of matches | Num. of significant matches | Num. of sequences | Num. of significant sequences | emPAI    | Description                                                                                    |
|--------|--------|------------------------|-------|-------|-----------------|-----------------------------|-------------------|-------------------------------|----------|------------------------------------------------------------------------------------------------|
| 1      | 1      | sp P37840-2 SYUA_HUMAN | 5476  | 11365 | 175             | 150                         | 28                | 28                            | 55544.44 | Isoform 2-4of Alpha-synuclein OS=Homo sapiens OX=9606GN=SNCA                                   |
| 1      | 2      | sp P61142 SYUA_MACACA  | 3865  | 14464 | 151             | 126                         | 27                | 27                            | 4435.21  | Alpha-synuclein OS=Macaca fascicularis OX=9541GN=SNCAPE=3 SV=1                                 |
| 1      | 3      | sp O55042-2 SYUA_MOUSE | 3087  | 12395 | 117             | 105                         | 23                | 23                            | 6718.85  | Isoform 2 of Alpha-synuclein OS=Mus musculus OX=10090GN=Snca                                   |
| 1      | 4      | sp Q3TOG8 SYUA_BOVINE  | 1905  | 14499 | 90              | 78                          | 16                | 16                            | 258.07   | Alpha-synuclein OS=Bostaurus OX=9913 GN=SNCAPE=2 SV=1                                          |
| 1      | 5      | sp Q91448 SYUA_SERPENT | 1431  | 14864 | 88              | 76                          | 16                | 16                            | 293.1    | Alpha-synuclein OS=Serinuscanaria OX=9135 GN=SNCAPE=2 SV=1                                     |
| 2      | 1      | sp C0PZP0 RSALMONELLA  | 1884  | 16009 | 43              | 43                          | 18                | 18                            | 251.61   | 50S ribosomal protein L13 OS=Salmonellaparatyphi C (strain RKS4594) OX=476213GN=rplM PE=3 SV=1 |
| 3      | 1      | sp P0A9A9 FUR_ECOLI    | 1172  | 17012 | 23              | 23                          | 13                | 13                            | 31.37    | Ferric uptake regulation protein OS=Escherichiacoli (strain K12) OX=83333 GN=fur PE=1 SV=1     |
| 4      | 1      | sp P0A7W1 RS5_ECOLI    | 336   | 17592 | 8               | 7                           | 7                 | 6                             | 2.54     | 30S ribosomal protein S5 OS=Escherichiacoli (strain K12) OX=83333 GN=rpsE PE=1 SV=2            |
| 5      | 1      | sp P00761 TRYPSIN      | 327   | 25078 | 8               | 8                           | 5                 | 5                             | 1.44     | Trypsin OS=Susscrofa OX=9823PE=1 SV=1                                                          |
| 6      | 1      | sp C0Q0C4 RSALMONELLA  | 188   | 13957 | 9               | 7                           | 9                 | 7                             | 5.27     | 30S ribosomal protein S12 OS=Salmonellaparatyphi C (strain RKS4594) OX=476213GN=rpsL PE=3 SV=1 |
| 8      | 1      | sp P0AFX4 RSALMONELLA  | 128   | 18288 | 3               | 3                           | 3                 | 3                             | 0.83     | Regulator of sigmaD OS=Escherichiacoli (strain K12) OX=83333GN=rsd PE=1 SV=1                   |
| 10     | 1      | sp P0A7M2 RSALMONELLA  | 89    | 9058  | 3               | 3                           | 3                 | 3                             | 2.28     | 50S ribosomal protein L28 OS=Escherichiacoli (strain K12) OX=83333 GN=rpmB PE=1 SV=2           |

**Supplementary Figure 5** Technical controls. Raw data of the positive control (lysate of the midbrain of a Braak stage 3 PD) and negative control (unseeded substrate in SAA buffer, i.e. recombinant protein alone). **A)** Left: Lag times of 15 separate experiments (from all plates on which the samples included in the current study were run) of the positive and negative controls. Mean  $\pm$ SD are shown in gray lines. Right: number of positive replicates (crossing 10% rfu within 70 hours) in the same n=15 runs. **B)** ThT curves of the experiments. Individual means and S.E.M are plotted. **C)** Mean values of all tests  $\pm$ S.E.M. for the positive and negative control are plotted. **D)** Individual plots of all negative controls used in the study (n=15) **E)** Individual plots of the corresponding positive controls (n=15).

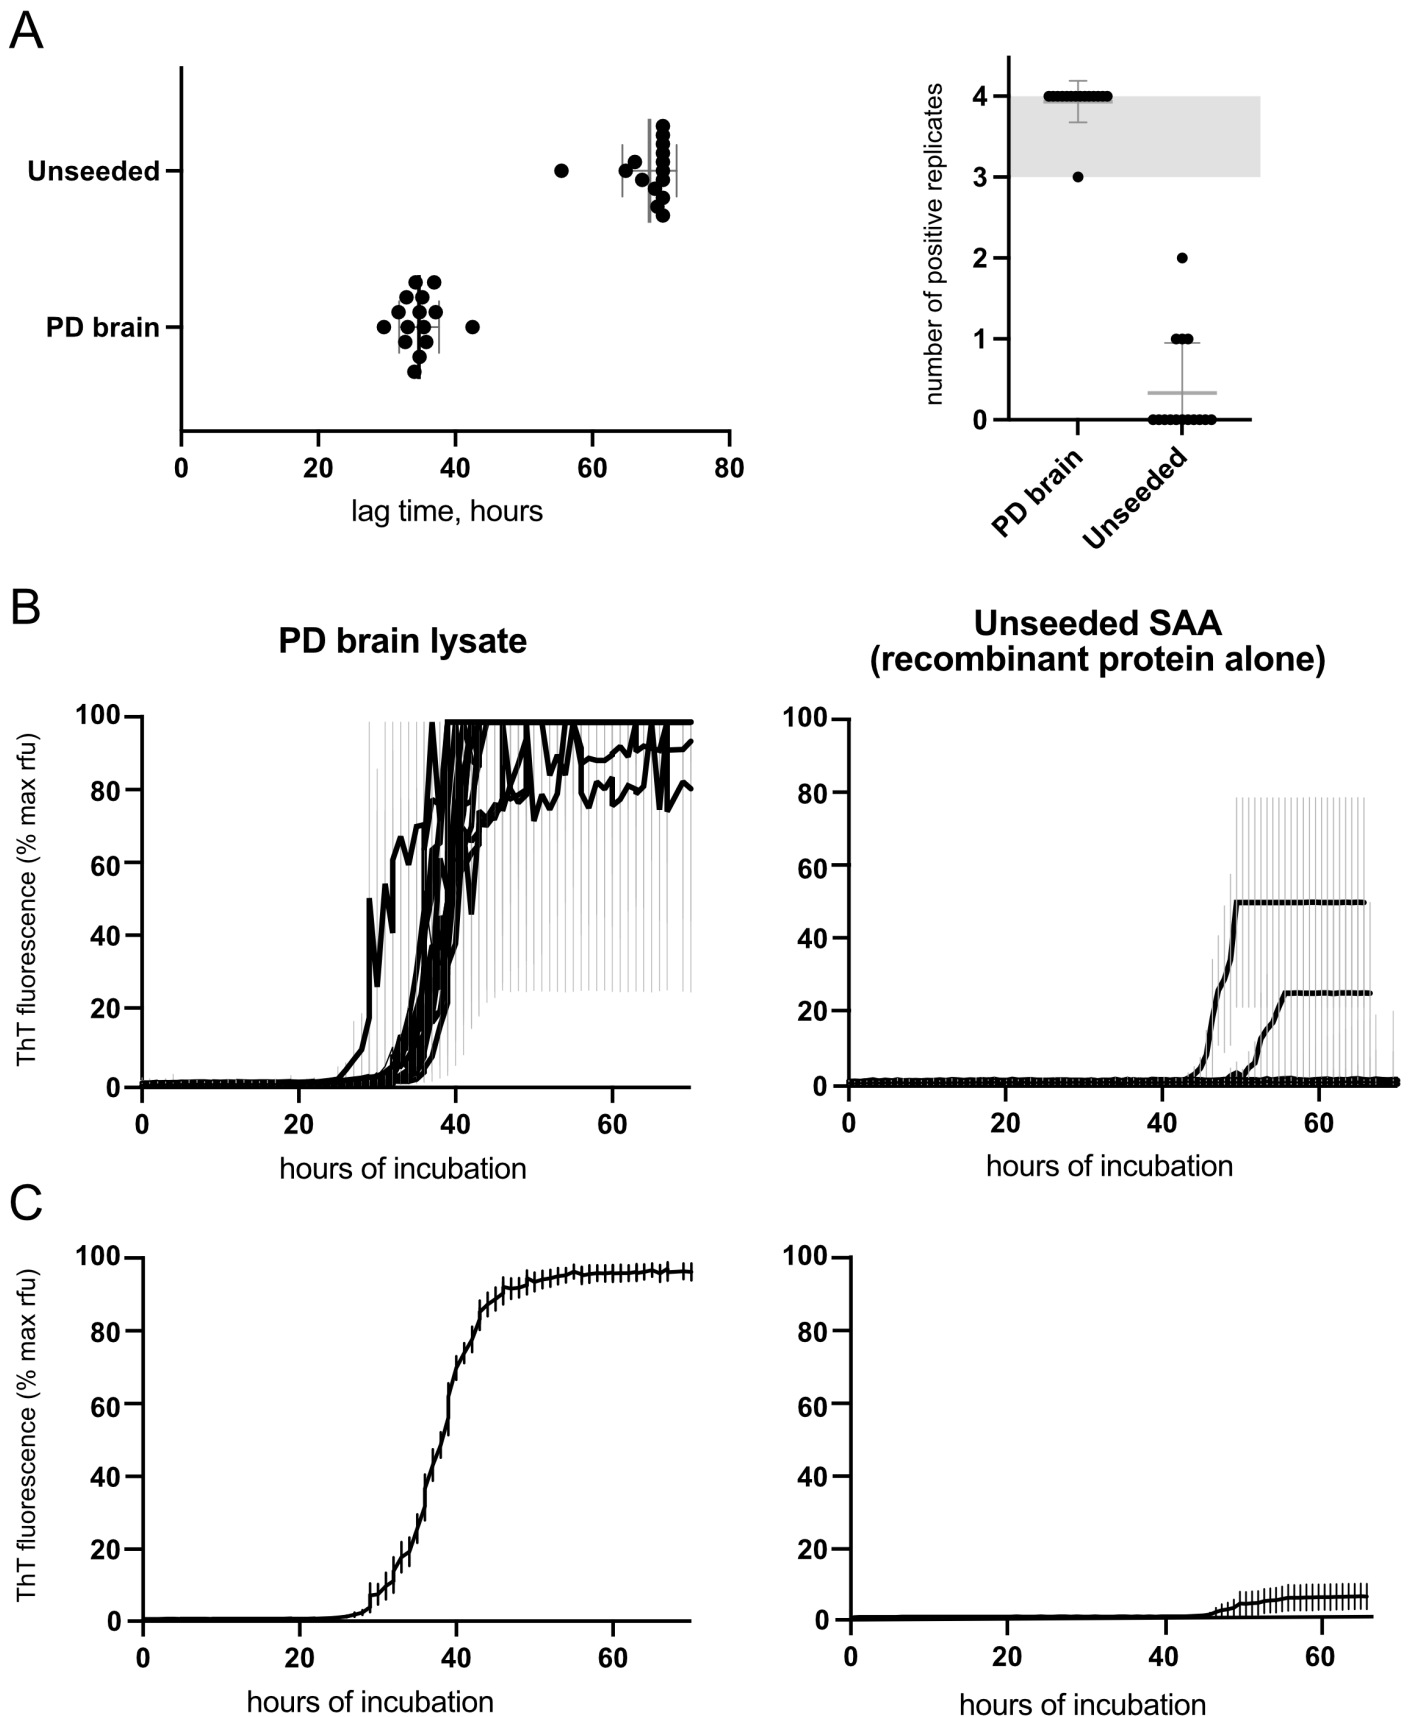

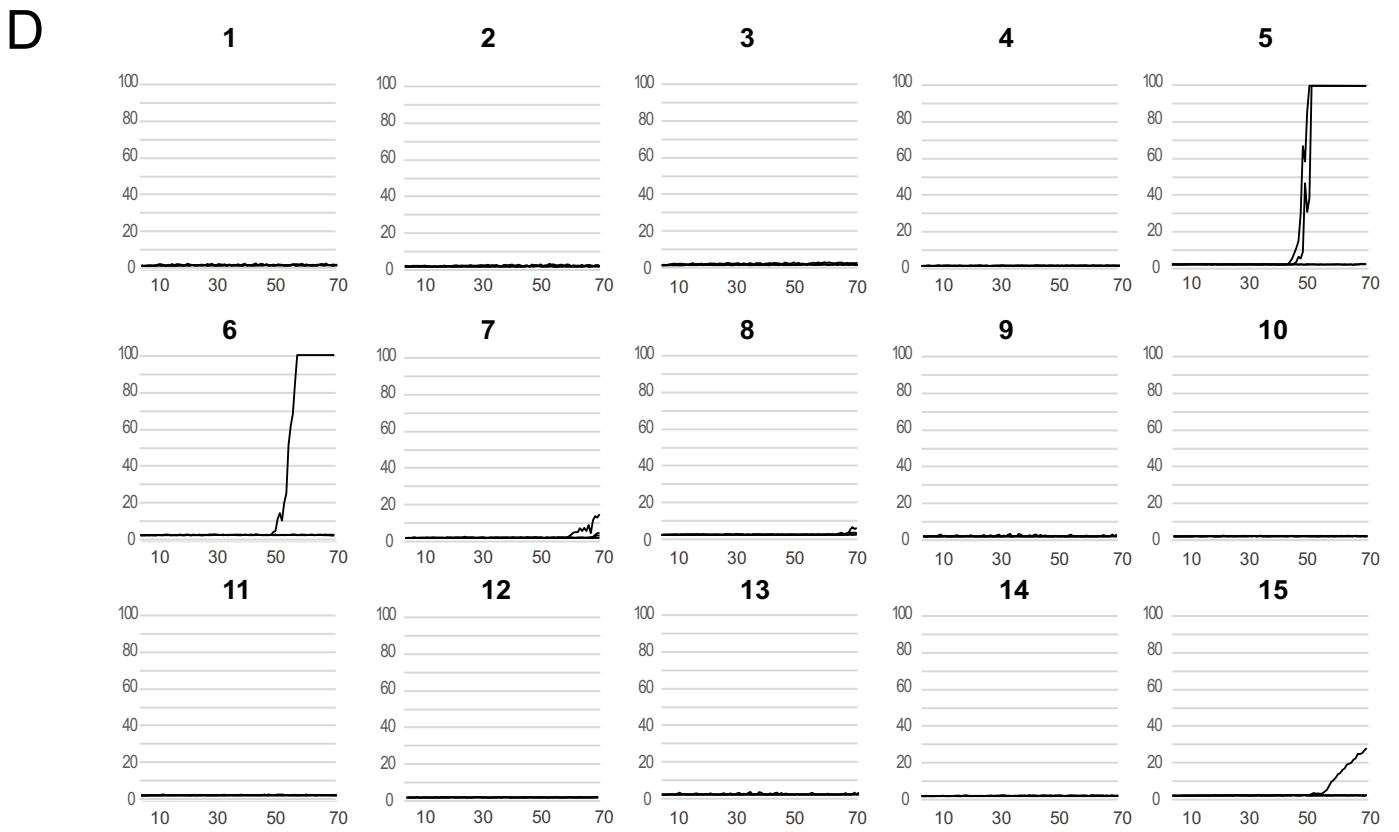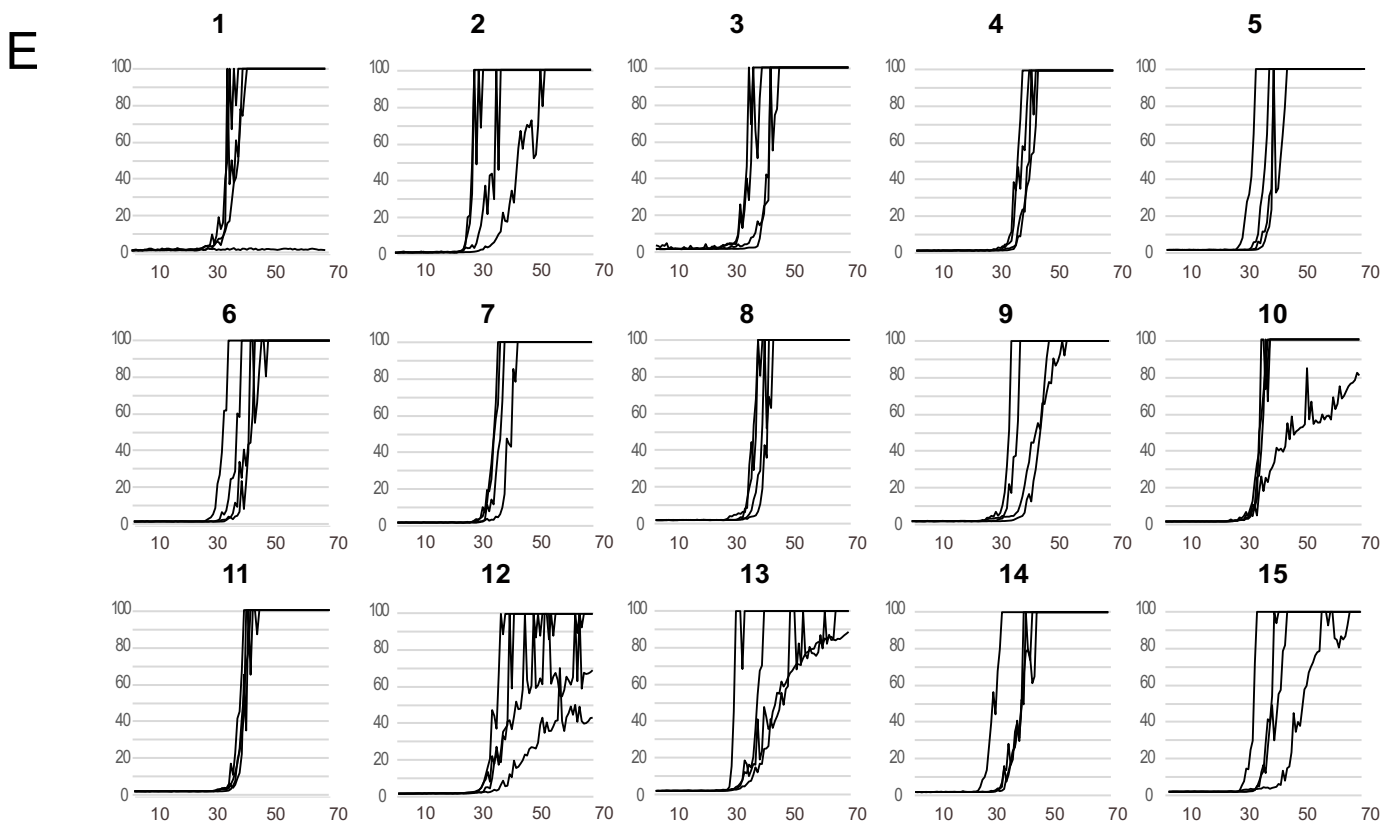

**Supplementary Table 1:** Characteristics of patients with a negative skin biopsy compared to the rest of the PD cohort.

|                                                                                        | PD patients with a negative skin SAA (presumed brain-first), N=4*                                 | The rest of the PD cohort (who received both tests), N=15 | p-value   |
|----------------------------------------------------------------------------------------|---------------------------------------------------------------------------------------------------|-----------------------------------------------------------|-----------|
| female:male ratio                                                                      | 1:3                                                                                               | 5:10                                                      | 1         |
| MoCA, average (SD)                                                                     | 27.8 (1.71)                                                                                       | 27.5 (2.00)                                               | 0.836     |
| MCI, n (%)                                                                             | 0 (0.00%)                                                                                         | 2 (13.3%)                                                 | 1         |
| Motor subtype:                                                                         |                                                                                                   |                                                           | 0.361     |
| akinetiic-rigid, n (%)                                                                 | 1 (25.0%)                                                                                         | 10 (66.7%)                                                |           |
| mixed, n (%)                                                                           | 2 (50.0%)                                                                                         | 4 (26.7%)                                                 |           |
| tremor-dominant, n (%)                                                                 | 1 (25.0%)                                                                                         | 1 (6.67%)                                                 |           |
| Sniffin' sticks, sum (SD)                                                              | 21.6 (8.92)                                                                                       | 18.6 (5.58)                                               | 0.574     |
| H&Y stage, average (SD)                                                                | 2.00 (0.00)                                                                                       | 2.47 (0.52)                                               | 0.004     |
| Disease duration, average (SD), <i>excluding a single patient with 1-year duration</i> | 7.00 (4.97), 9 (3.6)                                                                              | 13.9 (4.39)                                               | 0.061     |
| Age at diagnosis, average (SD)                                                         | 56.8 (14.1)                                                                                       | 49.7 (10.3)                                               | 0.406     |
| Familial PD history, n (%)                                                             | 0 (0.00%)                                                                                         | 5 (33.3%)                                                 | 0.53      |
| DBS surgery, n (%)                                                                     | 3 (75.0%)                                                                                         | 10 (66.7%)                                                | 1         |
| positive RBD screening, n (%)                                                          | 0 (0.00%)                                                                                         | 9 (60.0%)                                                 | 0.087     |
| NMSQ sum, average (SD)                                                                 | 6.00 (1.41)                                                                                       | 9.93 (4.53)                                               | 0.011     |
| <b>Responses in NMSQ with most striking differences</b>                                |                                                                                                   |                                                           |           |
| <b>NMSQ questionnaire (Number of patients who reported the symptom)</b>                | 5. Constipation (less than 3 bowel movements a week) or having to strain to pass a stool (faeces) | 0 (0.00%)                                                 | 6 (40.0%) |
|                                                                                        | 11. Unexplained change in weight (not due to change in diet)                                      | 0 (0.00%)                                                 | 5 (33.3%) |
|                                                                                        | 12. Problems remembering things that have happened recently or forgetting to do things            | 0 (0.00%)                                                 | 7 (46.7%) |
|                                                                                        | 14. Seeing or hearing things that you know or are told are not there                              | 0 (0.00%)                                                 | 5 (33.3%) |
|                                                                                        | 20. Feeling lightheaded, dizzy or weak standing from sitting or lying                             | 0 (0.00%)                                                 | 4 (26.7%) |
|                                                                                        | 21. Falling                                                                                       | 0 (0.00%)                                                 | 3 (20.0%) |
|                                                                                        | 22. Finding it difficult to stay awake during activities such as working, driving or eating       | 0 (0.00%)                                                 | 5 (33.3%) |
|                                                                                        | 24. Intense, vivid dreams or frightening dreams                                                   | 0 (0.00%)                                                 | 8 (53.3%) |



|                                                                                                                  |                                                                                                                                 |             |             |       |
|------------------------------------------------------------------------------------------------------------------|---------------------------------------------------------------------------------------------------------------------------------|-------------|-------------|-------|
|                                                                                                                  | 25. Talking or moving about in your sleep as if you are 'acting' out a dream                                                    | 0 (0.00%)   | 8 (53.3%)   |       |
|                                                                                                                  | 29. Double vision                                                                                                               | 0 (0.00%)   | 4 (26.7%)   |       |
|                                                                                                                  | UPDRS part 1, sum (SD)                                                                                                          | 3.75 (2.63) | 6.67 (5.02) | 0.146 |
|                                                                                                                  | UPDRS part 2, sum (SD)                                                                                                          | 8.50 (6.76) | 14.5 (4.76) | 0.172 |
|                                                                                                                  | UPDRS part 4, sum (SD)                                                                                                          | 2.25 (4.50) | 5.60 (5.05) | 0.252 |
| <b>Responses in MDS-UPDRS with most striking differences</b>                                                     |                                                                                                                                 |             |             |       |
| <b>MDS-UPDRS scale. Average response for the group. Each symptom's intensity/frequency was rated from 0 to 4</b> | 1.11 Over the past week have you had constipation troubles that cause you difficulty moving your bowels?                        | 0.00 (0.00) | 1.13 (1.06) | 0.001 |
|                                                                                                                  | 1.12 Over the past week, have you felt faint, dizzy, or foggy when you stand up after sitting or lying down?                    | 0.00 (0.00) | 0.60 (0.99) | 0.033 |
|                                                                                                                  | 2.8 Over the past week, have you usually had trouble doing your hobbies or other things that you like to do?                    | 0.25 (0.50) | 1.47 (1.30) | 0.012 |
|                                                                                                                  | 2.12 Over the past week, have you usually had problems with balance and walking?                                                | 0.25 (0.50) | 1.60 (1.12) | 0.004 |
|                                                                                                                  | 2.13 Over the past week, on your usual day when walking, do you suddenly stop or freeze as if your feet are stuck to the floor? | 0.00 (0.00) | 0.80 (1.08) | 0.013 |
|                                                                                                                  | 4.1 Time spent with dyskinesias                                                                                                 | 0.00 (0.00) | 0.60 (0.83) | 0.014 |
|                                                                                                                  | 4.2 Functional impact of dyskinesias                                                                                            | 0.00 (0.00) | 0.87 (1.51) | 0.043 |

\* Nasal brushing SAA was positive in 3 of these patients; in the remaining patient (PD-5), nasal brushing was negative and also found to inhibit aggregation of the positive control (i.e. false-negative is possible).

# Parkinson's disease

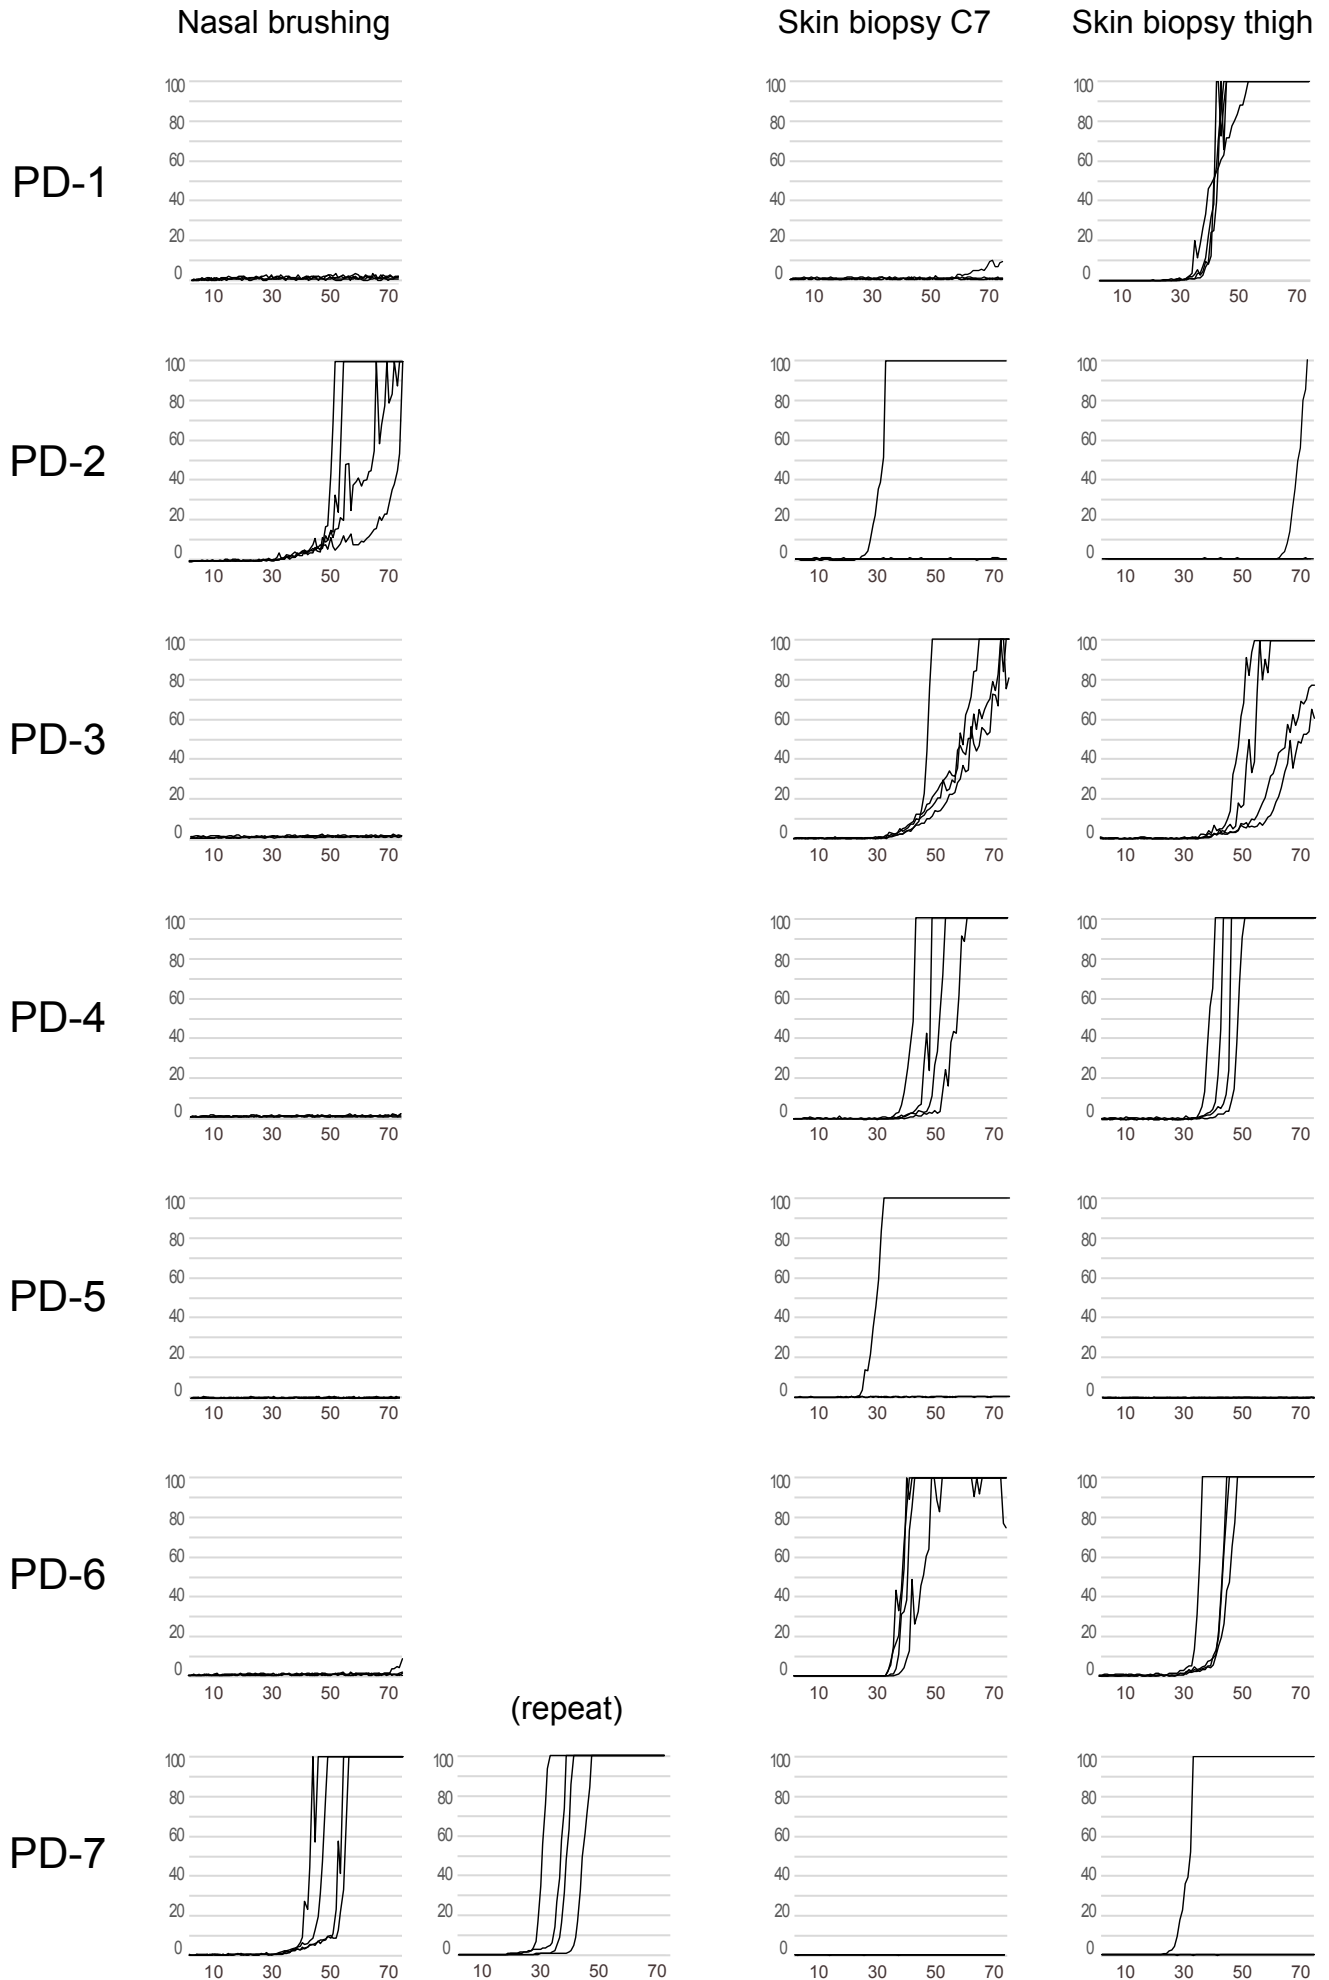

(repeat)

## Nasal brushing

## Skin biopsy

Neck C7

Thigh

PD-8

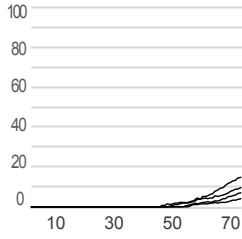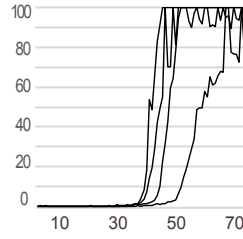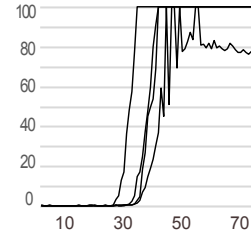

PD-9

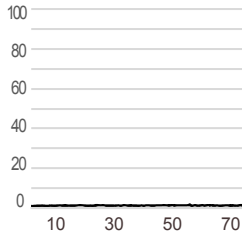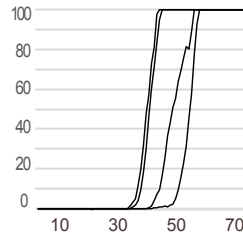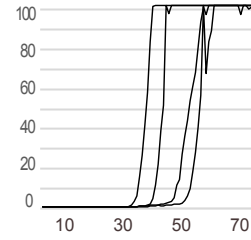

PD-10

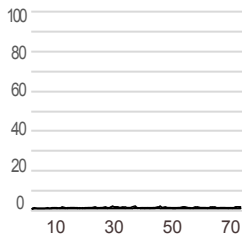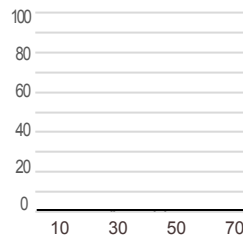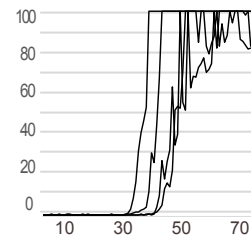

PD-11

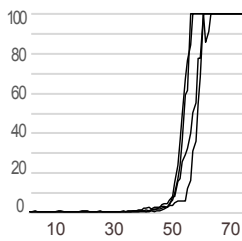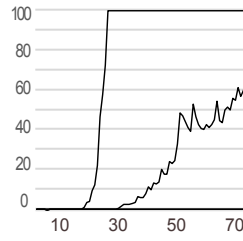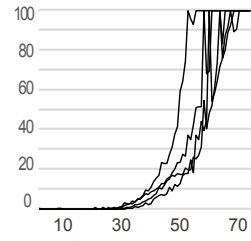

PD-12

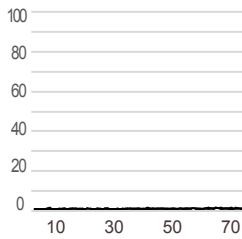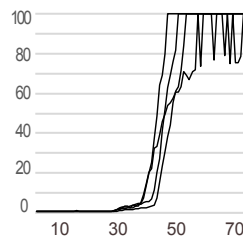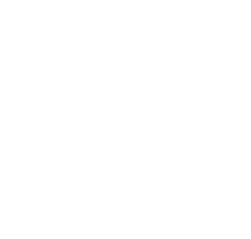

PD-13

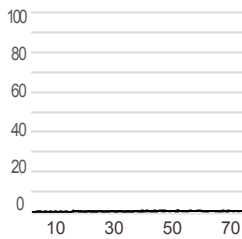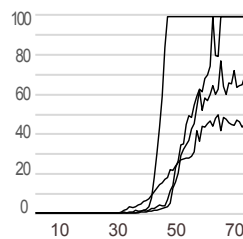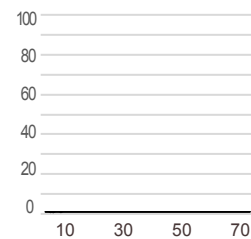

PD-14

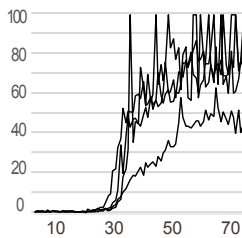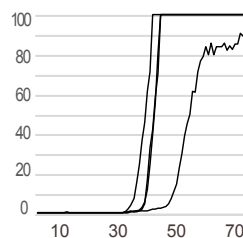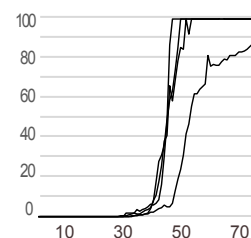

# Nasal brushing

PD-15

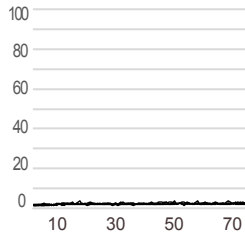

PD-16

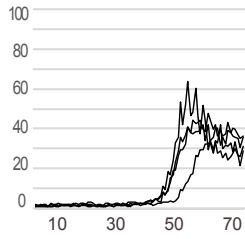

PD-17

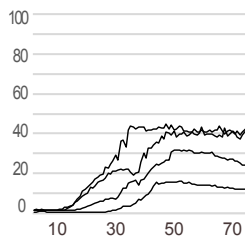

(repeat)

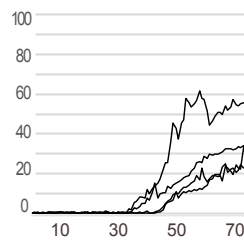

(repeat 2)

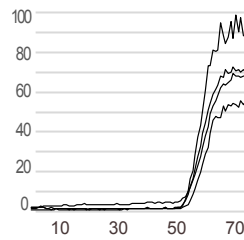

PD-18

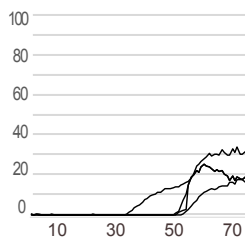

(repeat)

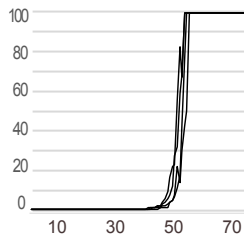

PD-19

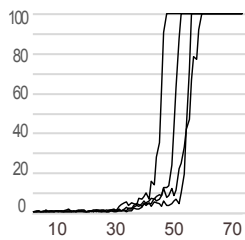

(repeat)

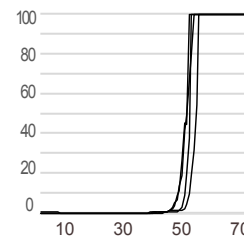

PD-20

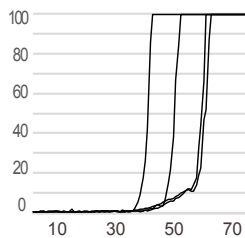

# Skin biopsy

Neck C7

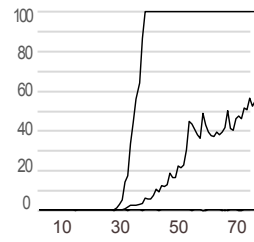

Thigh

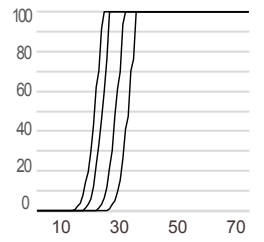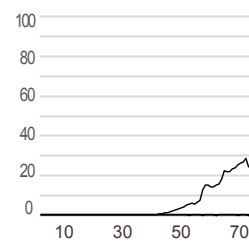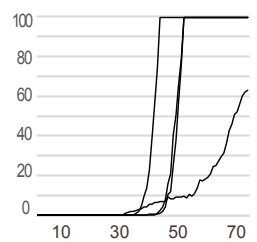

### Nasal brushing

### Skin biopsy

PD-21

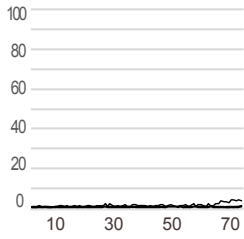

Neck C7

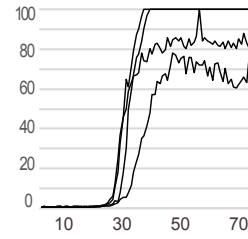

Thigh

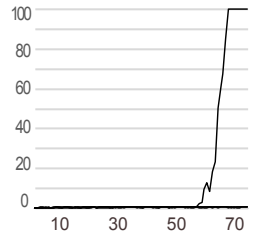

PD-22

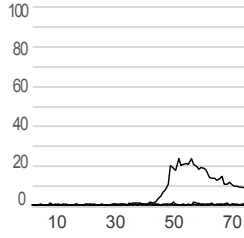

(repeat)

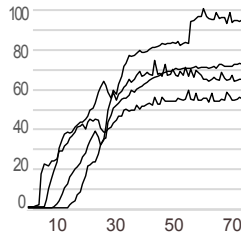

PD-23

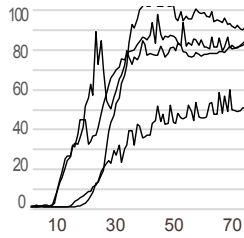

PD-24

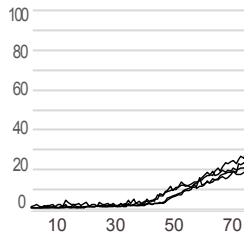

(repeat)

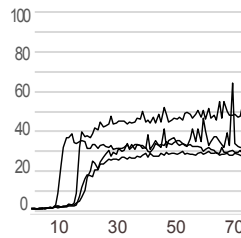

PD-25

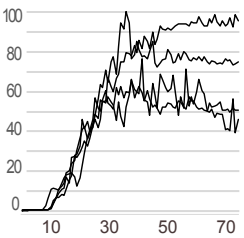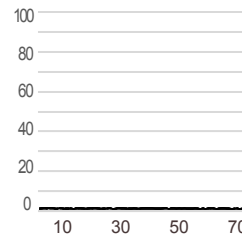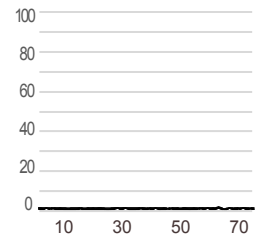

PD-26

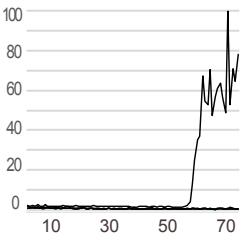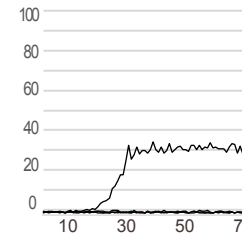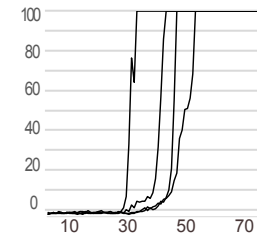

(repeat)

(repeat 2)

PD-27

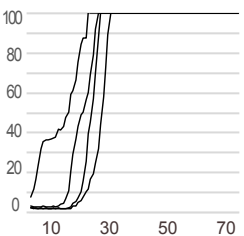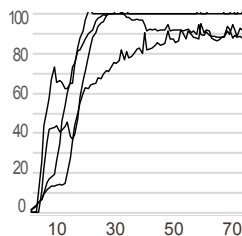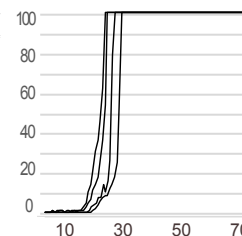

# REM sleep behavior disorder

Nasal brushing

Skin biopsy

right-sided

left-sided

Neck C7

Thigh

RBD-1

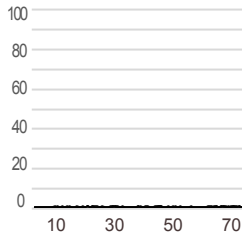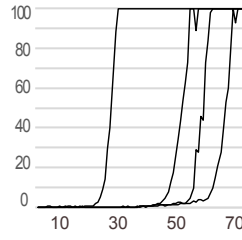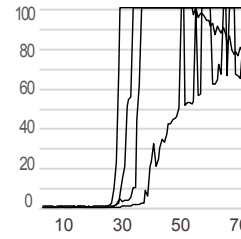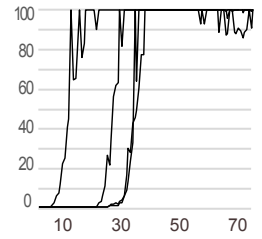

RBD-2

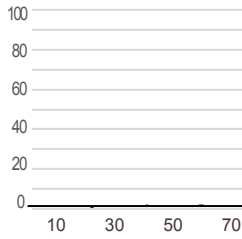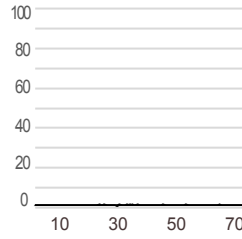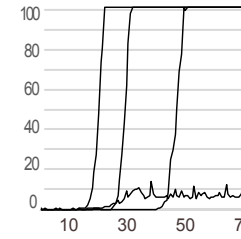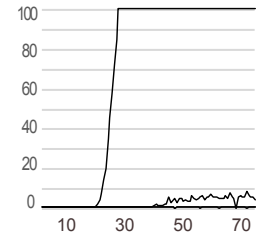

RBD-3

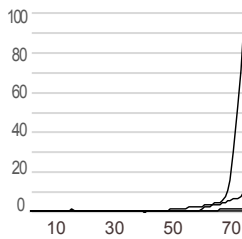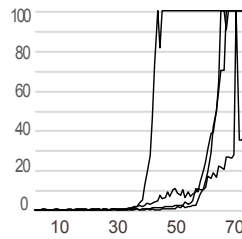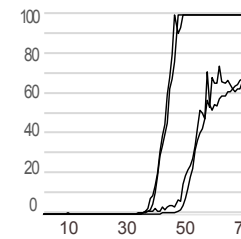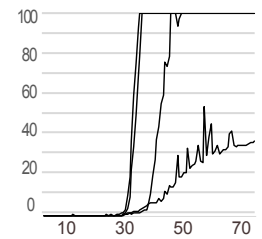

RBD-4

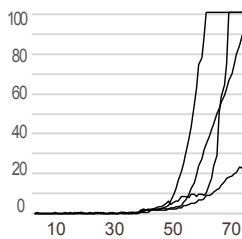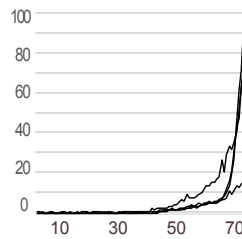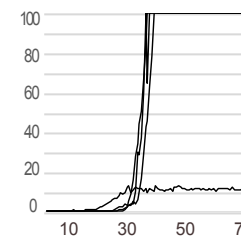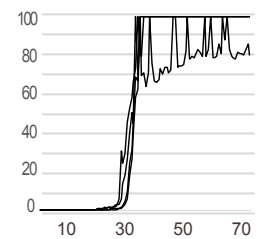

RBD-5

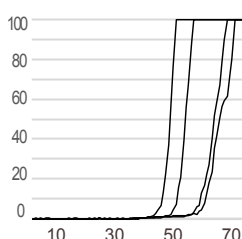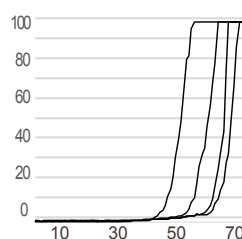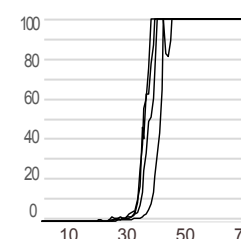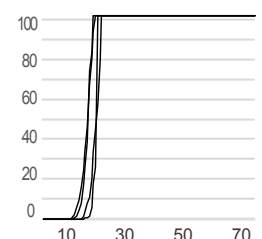

RBD-6

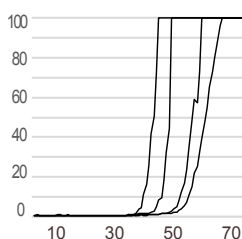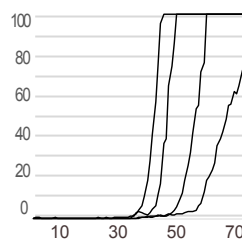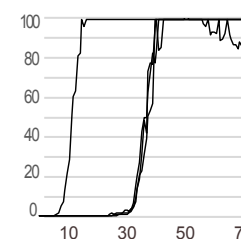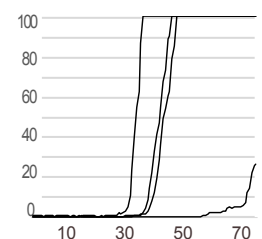

RBD-7

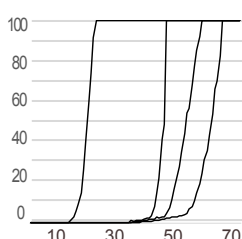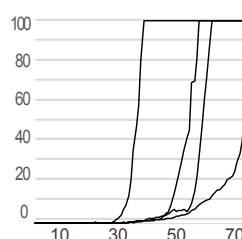

# REM sleep behavior disorder

## Nasal brushing

## Skin biopsy

right-sided

left-sided

Neck C7

Thigh

RBD-8

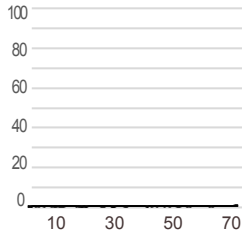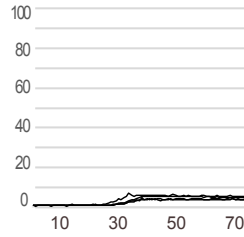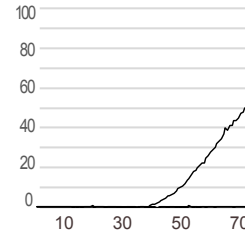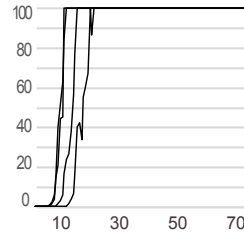

RBD-9

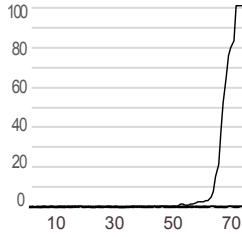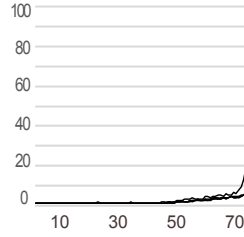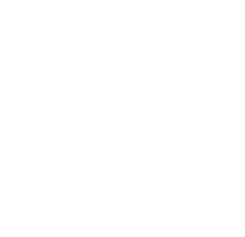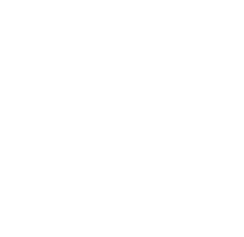

RBD-10

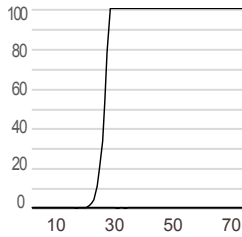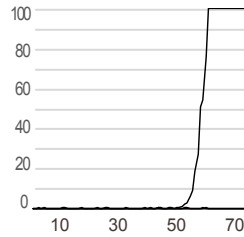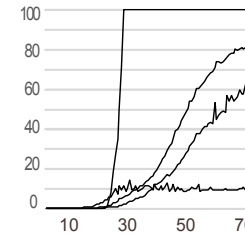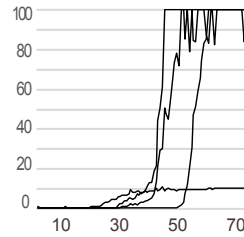

RBD-11

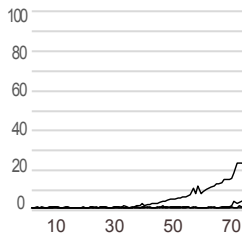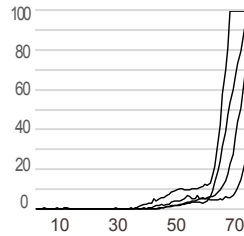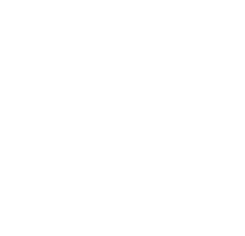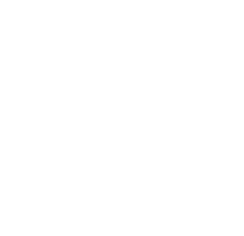

RBD-12

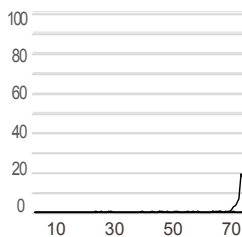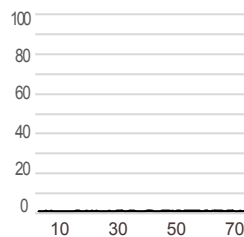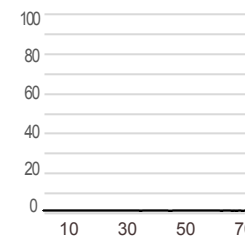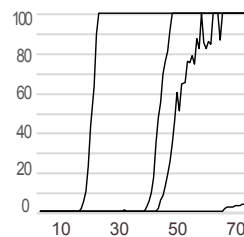

RBD-13

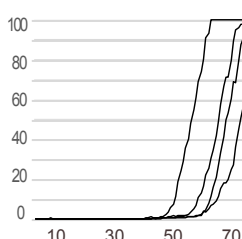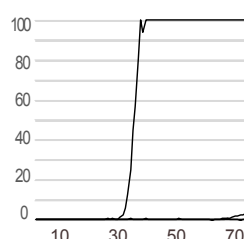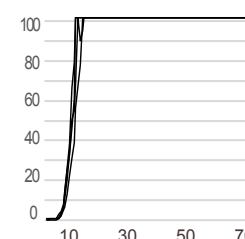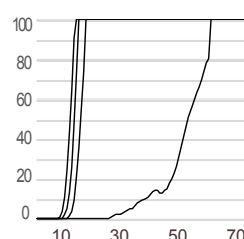

RBD-14

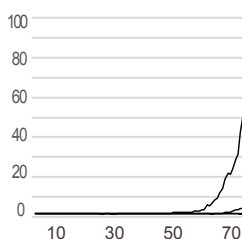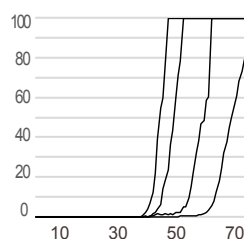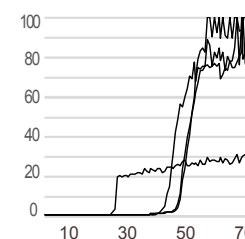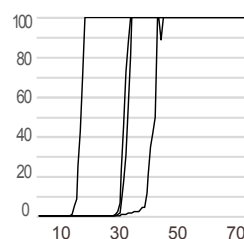

### Nasal brushing

### Skin biopsy

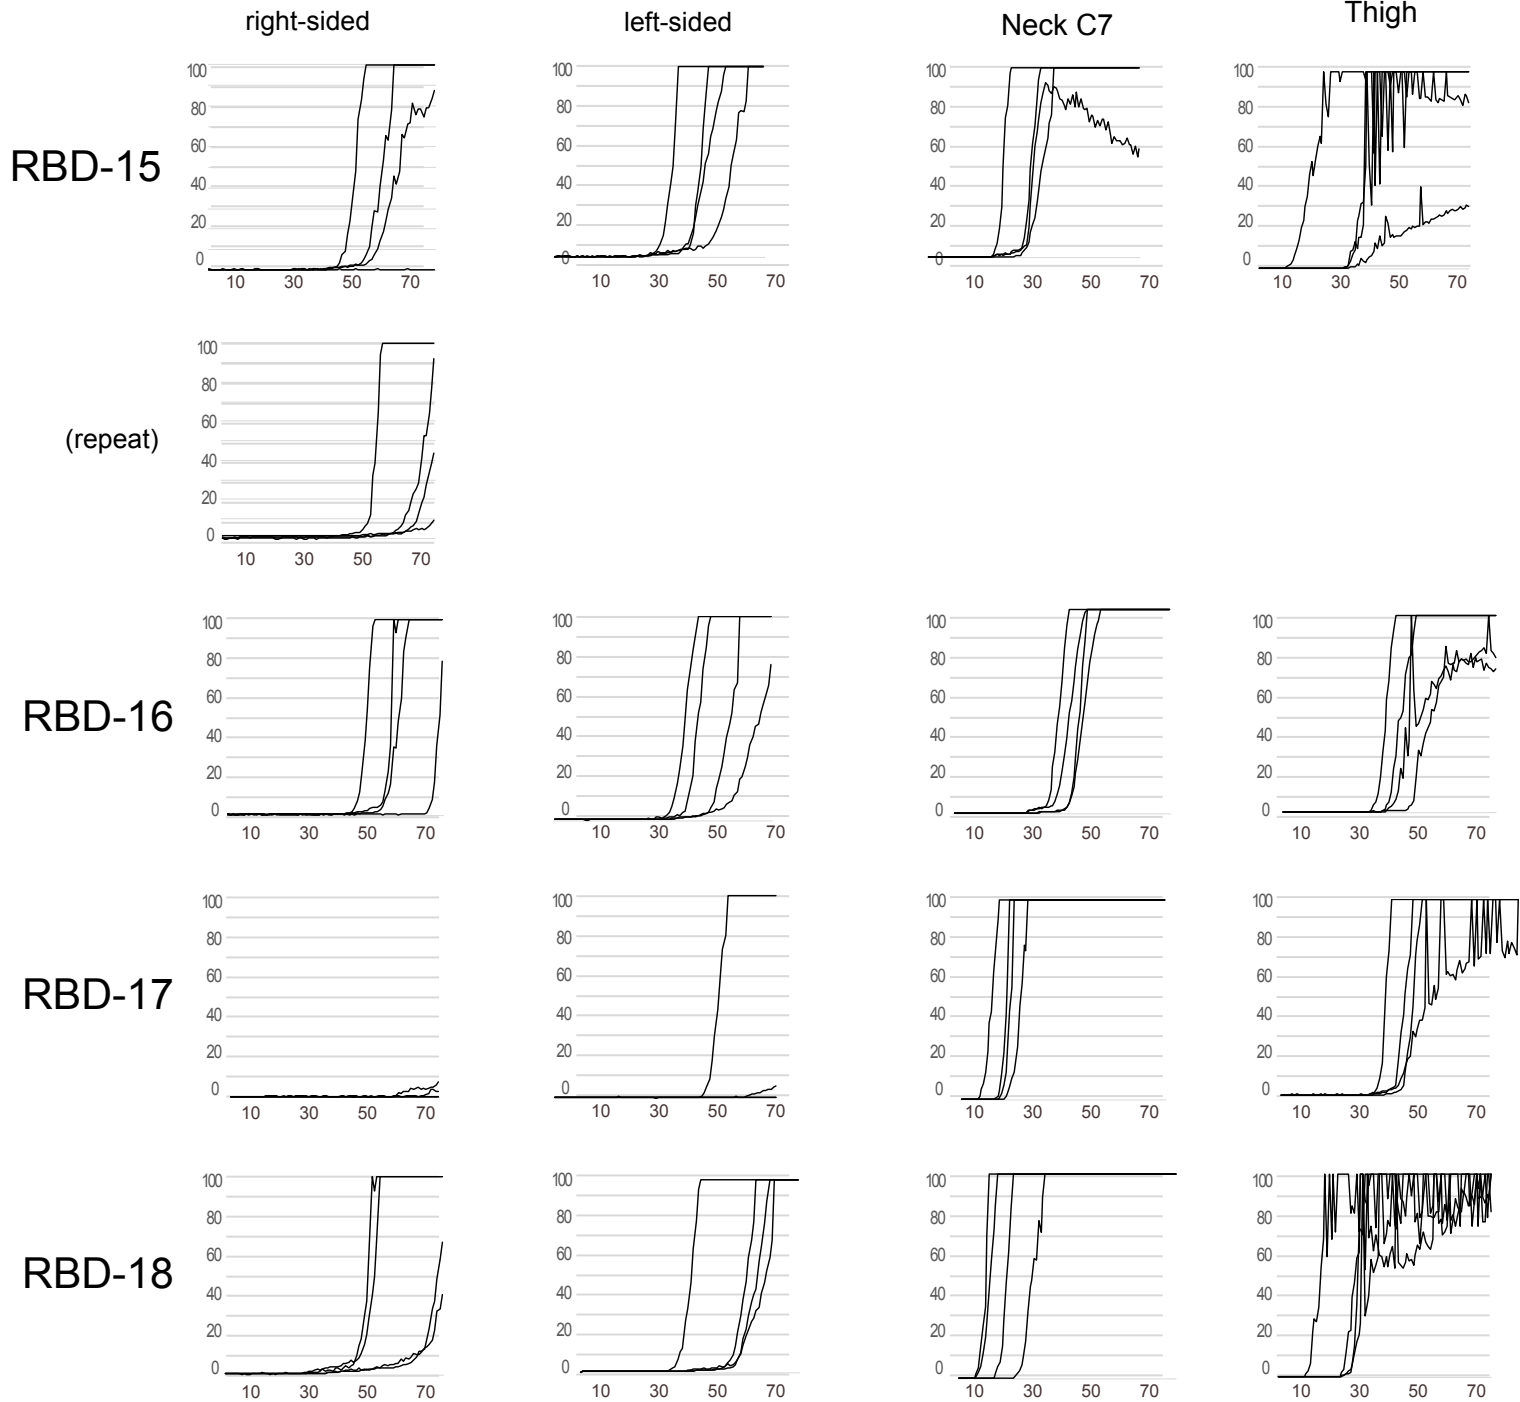



# Control group

Nasal brushing

C-1

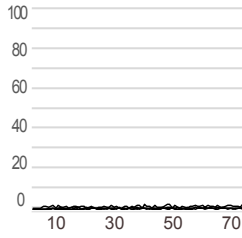

C-2

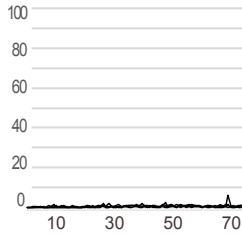

C-3

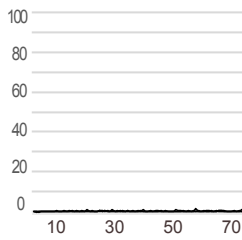

C-4

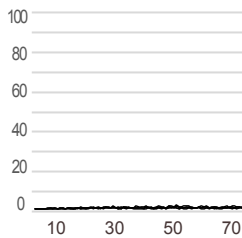

C-5

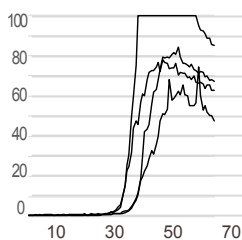

C-6

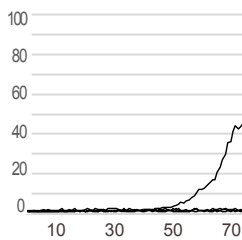

C-7

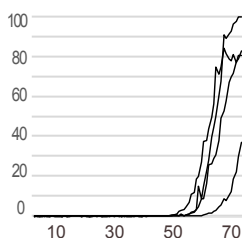

Nasal brushing

C-8

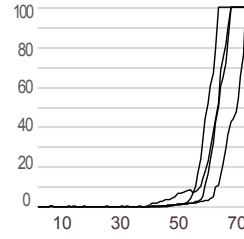

C-9

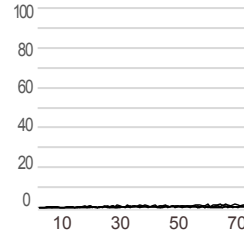

C-10

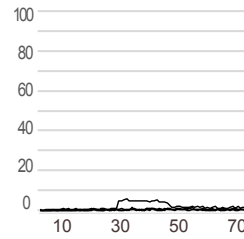

C-11

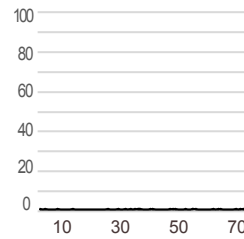

C-12

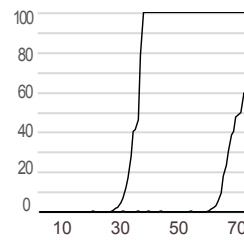

C-13

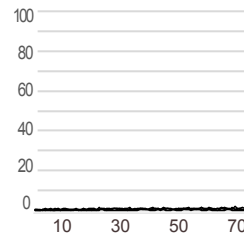

C-14

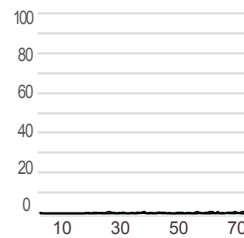

(repeat)

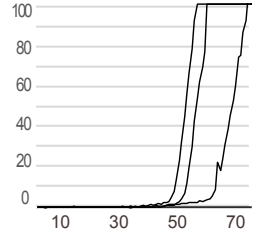

(repeat)

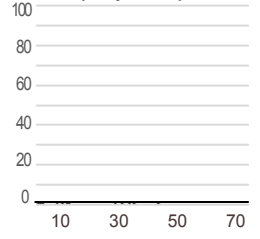

(repeat)

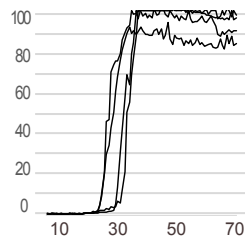

(repeat)

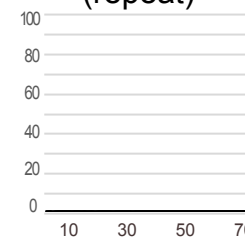

(repeat)

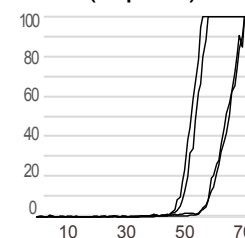

# Control group

Nasal brushing

C-15

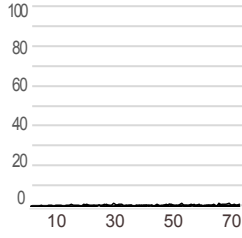

C-16

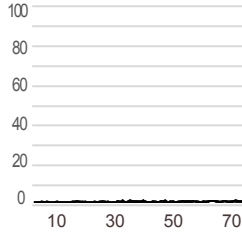

C-17

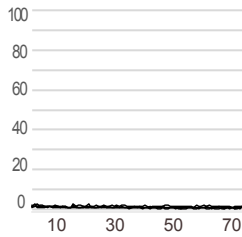

C-18

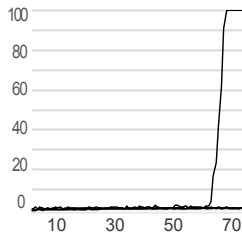

C-19

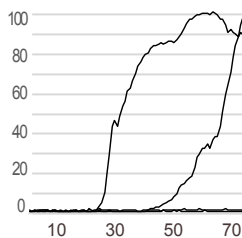

C-20

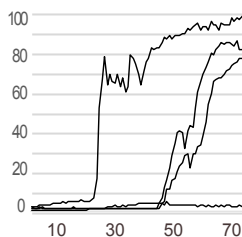

C-21

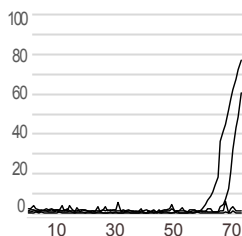

(repeat)

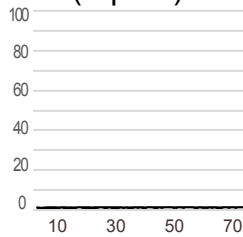

(repeat)

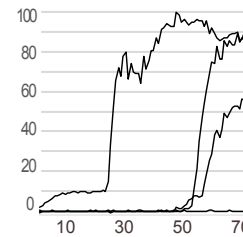

Nasal brushing

C-22

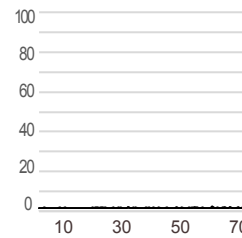

C-23

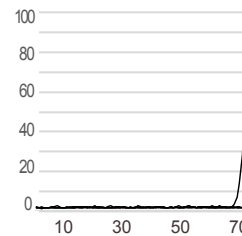

C-24

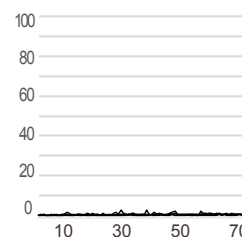

C-25

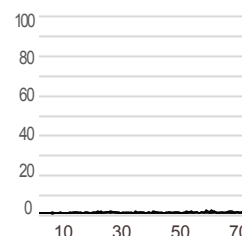

C-26

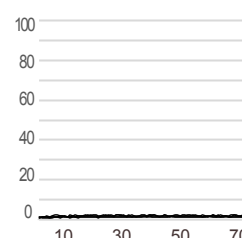

C-27

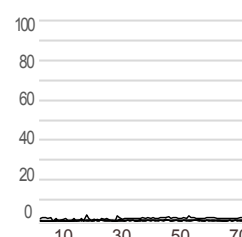

C-28

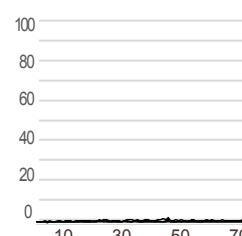

(repeat)

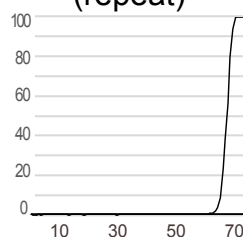

(repeat)

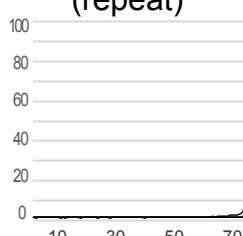

# Control group

## Nasal brushing

C-29

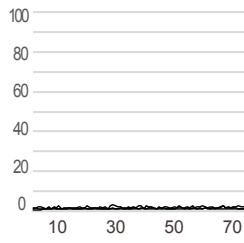

C-30

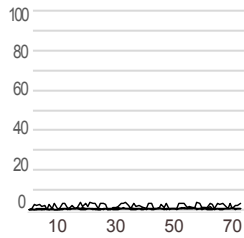

# MSA

## Nasal brushing

MSA-1  
(MSA-P)

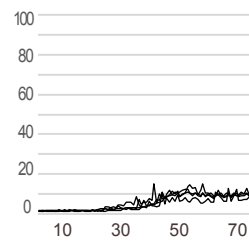

MSA-2  
(MSA-C)

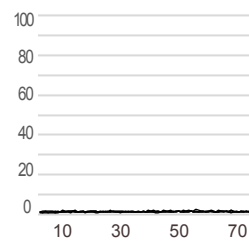

MSA-3  
(MSA-P)

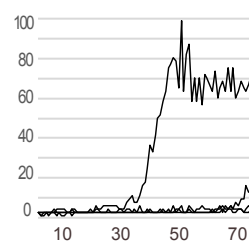

## Skin biopsy

Neck C7

Thigh

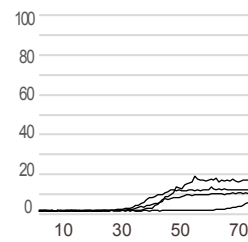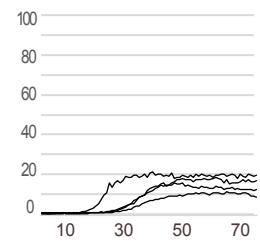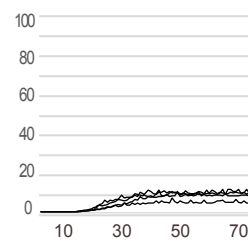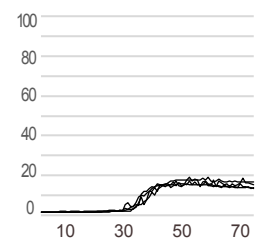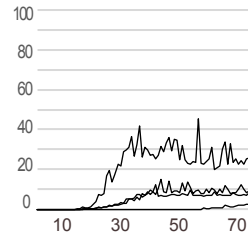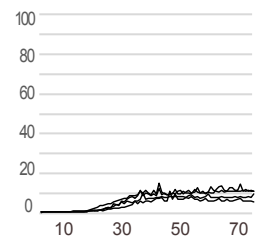

# PSP

## Nasal brushing

PSP-1

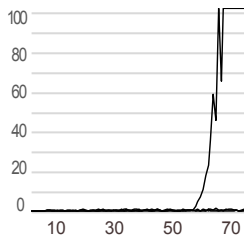

PSP-2

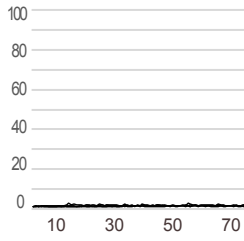

PSP-3

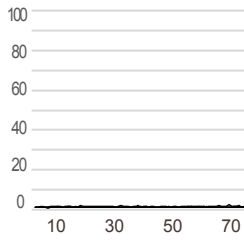

## Skin biopsy

Neck C7

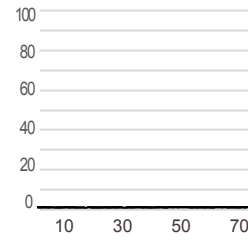

Thigh

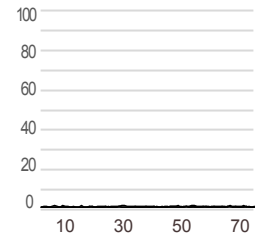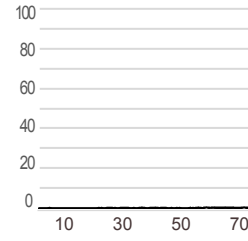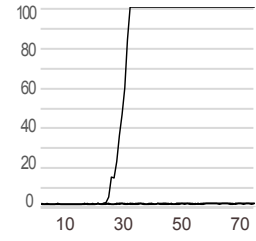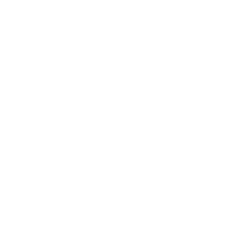

Supplement: 41531_2023_519_MOESM2_ESM.pdf [file 41531_2023_519_MOESM2_ESM.pdf]
